## Research Article

# Identification of a novel mutation in the *ABCA4* gene in a Chinese family with retinitis pigmentosa using exome sequencing

Xiangjun Huang<sup>1</sup>, Lamei Yuan<sup>2</sup>, Hongbo Xu<sup>2</sup>, Wen Zheng<sup>3</sup>, Yanna Cao<sup>4</sup>, Junhui Yi<sup>4</sup>, Yi Guo<sup>5</sup>, Zhijian Yang<sup>2</sup>, Yu Li<sup>2</sup> and Hao Deng<sup>2,3</sup>

<sup>1</sup>Department of General Surgery, The First Affiliated Hospital of Hunan University of Chinese Medicine, Changsha, China; <sup>2</sup>Center for Experimental Medicine, The Third Xiangya Hospital, Central South University, Changsha, China; <sup>3</sup>Department of Neurology, The Third Xiangya Hospital, Central South University, Changsha, China; <sup>4</sup>Department of Ophthalmology, The Third Xiangya Hospital, Central South University, Changsha, China; <sup>5</sup>Department of Medical Information, Information Security and Big Data Research Institute, Central South University, Changsha, China

**Correspondence:** Hao Deng (hdeng008@yahoo.com)

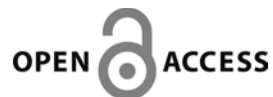

Retinitis pigmentosa (RP) is a group of hereditary, degenerative retinal disorders characterized by progressive retinal dysfunction, outer retina cell loss, and retinal tissue atrophy. It eventually leads to tunnel vision and legal or total blindness. Here, we aimed to reveal the causal gene and mutation contributing to the development of autosomal recessive RP (arRP) in a consanguineous family. A novel homozygous mutation, c.4845delT (p.K1616Rfs\*46), in the ATP-binding cassette subfamily A member 4 gene (*ABCA4*) was identified. It may reduce *ABCA4* protein activity, leading to progressive degeneration of both rod and cone photoreceptors. The study extends the arRP genotypic spectrum and confirms a genotype–phenotype relationship. The present study may also disclose some new clues for RP genetic causes and pathogenesis, as well as clinical and genetic diagnosis. The research findings may contribute to improvement in clinical care, therapy, genetic screening, and counseling.

## Introduction

Retinitis pigmentosa (RP, OMIM 268000) is a heterogeneous group of hereditary, degenerative retinal disorders with the estimated worldwide prevalence of 1/3000–1/7000. It affects approximately 0.1% of population in China [1,2]. Its features include night blindness, narrowed vision fields, gradually decreasing visual acuity, and fundus lesions eventually leading to tunnel vision and legal blindness [3,4]. It is frequently accompanied by cataracts, astigmatism, myopia, keratoconus, and hearing impairment except for those with Usher syndrome, which is characterized by RP and congenital deafness [5]. Pathologic features include progressive rod photoreceptor cell atrophy which leads to secondary cone death [6]. Histological characteristics are inner and outer retina disorganization with retinal ganglion cell death and vascular abnormalities, including perivascular cuffing, arteriolar attenuation, and decreased ocular blood flow [7]. RP is both clinically and genetically heterogeneous, inherited following Mendelian inheritance patterns. The most common RP inheritance pattern is autosomal recessive (50–60%), followed by autosomal dominant (30–40%), and X-linked trait (5–15%) [1,8,9]. Additionally, mitochondrial, *de novo*, and digenic mutations are reported in rare cases [10,11]. RP is thought to be caused by gene mutations which disrupt photoreceptor function or architecture [12]. The products of these genes participate in various molecular signal pathways, including, but not limited to, photoreceptor development, retinoid cycle, phototransduction, cilia, outer segment development, and protein transport [13].

Mutations in the ATP-binding cassette subfamily A member 4 gene (*ABCA4*, previously called *ABCR*, OMIM 601691) have been described as being responsible for a series of abnormalities, including cone-rod

Received: 26 September 2017  
Revised: 27 January 2018  
Accepted: 29 January 2018

Accepted Manuscript Online:  
05 February 2018  
Version of Record published:  
16 March 2018

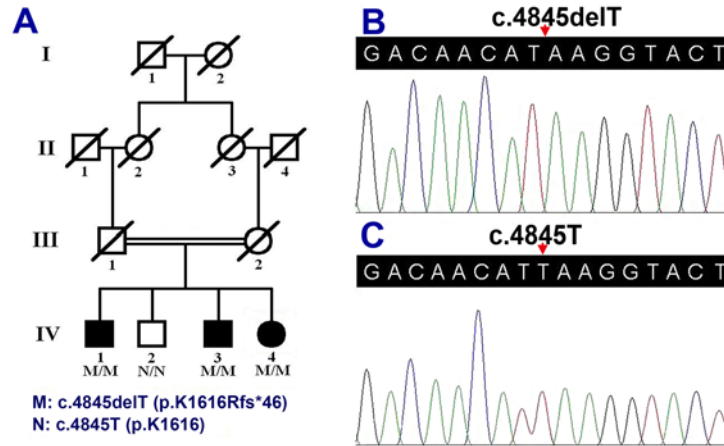

**Figure 1. The mutation c.4845delT (p.K1616Rfs\*46) in the *ABCA4* gene in a pedigree with RP**

(A) Pedigree of the family with arRP. Double lines indicate consanguineous unions. Square denotes male family member, circle represents female family member, slashed symbol indicates deceased family member, fully shaded symbol shows patient with RP, and open symbol presents RP-free member. (B) The *ABCA4* sequence with homozygous c.4845delT (p.K1616Rfs\*46) mutation (IV:4). (C) The normal *ABCA4* sequence of RP-free member (IV:2).

dystrophy 3 (CORD3, OMIM 604116), RP19 (OMIM 601718), age-related macular degeneration 2 (OMIM 153800), fundus flavimaculatus (FFM), Stargardt disease 1 (STGD1), and early-onset severe retinal dystrophy (OMIM 248200) [14-19]. Various *ABCA4* gene mutations ranging from point mutations to complex rearrangements have been identified, including missense, nonsense, splicing, insertion, deletion, and complex rearrangement mutations.

The present study is aimed at revealing the causative gene and mutation for the occurrence of autosomal recessive RP (arRP) in a consanguineous family with third-generation intermarriage. A novel homozygous mutation, c.4845delT (p.K1616Rfs\*46), in the *ABCA4* gene was detected in the pedigree, with progressive degeneration of both rod and cone photoreceptors with arRP clinical features.

## Materials and methods

### Study participants and clinical evaluation

Members of a four-generation Han Chinese pedigree with arRP, consisting of 12 individuals, were enrolled for genetic screening, at the Third Xiangya Hospital, Central South University, Changsha, China (Figure 1A). Peripheral venous blood of four available family members was sampled for the genetic study. All medical records of healthcare, routine physical, and fundus examinations were collected. Blood samples were also obtained from 100 independent ethnically matched normal controls (50 males and 50 females, age:  $35.2 \pm 4.3$  years). Informed written consent was obtained from all participating subjects in the present study. All participants had ophthalmologic examinations performed. The examinations included E decimal charts, visual field evaluations, slit-lamp biomicroscopy, and fundus inspection. The arRP diagnosis was determined according to manifestations of progressive visual field constriction, nyctalopia, typical fundus findings, and similar symptoms in family members. The present study was approved by the Institutional Review Board of the Third Xiangya Hospital, Central South University, Changsha, China.

### Exome capture

Genomic DNA was separated from peripheral venous blood cells using standard DNA phenol-chloroform extraction procedures. Exome sequencing was carried out in the proband (IV:4) of the family by Novogene Bioinformatics Institute (Beijing, China). The genomic DNA was fragmented with a Covaris Ultrasonic Sample Processor (Covaris, MA, U.S.A.). A paired-end DNA library was constructed and the whole exome capture was performed with the SureSelect Human All Exon V6 Kit (Agilent Technologies Inc., Santa Clara, CA, U.S.A.). After quality assessment, the captured DNA library was sequenced on the Illumina HiSeq 2000 platform following the Illumina protocols (Illumina Inc., San Diego, CA, U.S.A.) [20].

**Table 1 Clinical features of individuals affected with RP**

| Individual           | IV:1                                                                                                | IV:3                                                                                          | IV:4                                                                                 |
|----------------------|-----------------------------------------------------------------------------------------------------|-----------------------------------------------------------------------------------------------|--------------------------------------------------------------------------------------|
| Sex                  | M                                                                                                   | M                                                                                             | F                                                                                    |
| Current age (years)  | 67                                                                                                  | 48                                                                                            | 41                                                                                   |
| Age at onset (years) | 15                                                                                                  | 15                                                                                            | 16                                                                                   |
| VA (OD/OS)           | LP/HM                                                                                               | LP/HM                                                                                         | HM/HM                                                                                |
| Initial symptoms     | Decreased vision, needs for more light                                                              | Decreased vision, needs for more light                                                        | Decreased vision, needs for more light                                               |
| Ocular features      | No abnormalities                                                                                    | Nystagmus, oculomotor apraxia                                                                 | No abnormalities                                                                     |
| Fundus features      | A pale fundus, optic nerve atrophy, vessel attenuation, and retinal pigment epithelial degeneration | Bone spicule-like pigmentation, retinal vascular attenuation, and macular pigment alterations | Optic nerve atrophy, vessel attenuation, and retinal pigment epithelial degeneration |

Abbreviations: F, female; HM, hand movement; LP, light perception; M, male; OD, right eye; OS, left eye; VA, visual acuity.

## Variant analysis

After the base calling and quality assessment of sequencing data, alignment to human reference genome UCSC (GRCh37/hg19) was carried out for the effective sequencing data obtained using Burrows–Wheeler Aligner. SAM-tools and Picard tools were applied to sort sequencing alignments and mark duplicate reads, respectively. Single nucleotide polymorphisms (SNPs) with an alignment rate of  $\geq 95\%$  and a read depth of  $\geq 10\times$  were rated as ‘high confidence’ [21–23]. Based on the variant information, the called SNPs and indels were separated into different functional categories using the Annotate Variation annotation. Generally, variants associated with monogenic disorders are rare in public variant databases. With specific settings, variants were filtered using datasets from the SNP database (dbSNP, build 142), 1000 Genomes Project (2014 September release), the National Heart, Lung, and Blood Institute Exome Sequencing Project 6500 (NHLBI ESP6500), and the Exome Aggregation Consortium (ExAC).

After removing common variants, retained variants were recognized as ‘novel’ variants. Only variants, including SNPs and indels, located in exonic regions or in canonical splicing sites, were deemed plausible candidates and prioritized for further analysis. *In silico* analyses, including Sorting Intolerant from Tolerant (SIFT), Polymorphism Phenotyping version 2 (PolyPhen-2), MutationTaster, and Combined Annotation Dependent Depletion (CADD), were employed to obtain functional prediction. A left-plausible, candidate-gene variant associated with vision disorders was then prioritized for confirmation in the validation stage [24–27]. Locus-specific candidate primers were designed using the Primer3 (version 4.0.0) online software. The oligonucleotides were synthesized by Sangon Biotech (Shanghai) Co., Ltd. Direct Sanger sequencing for mutation validation was carried out on an Applied Biosystems 3500 genetic analyzer [26]. The primers were synthesized as listed: 5'-CAGGAGGAGGGATGGAATTT-3' and 5'-AAAACCGTCTTGTGTTTGTGTTT-3'.

## Results

### Clinical findings

Affected individuals (IV:1, IV:3, and IV:4, Figure 1A), including two males and one female, manifested similar clinical and funduscopic abnormalities including night blindness, decreased visual acuity, constricted vision field, waxy-pale discs, retinal vessel attenuation, and retinal degeneration. Patient IV:1 had night blindness and began having blurry vision at about the age of 15. This was followed by progressive visual field constriction before age 40. Patient IV:3 had progressive vision decrease beginning at 15, followed by tunnel vision. Patient IV:4 began having poor vision at night and blurred distance vision at 16 (Table 1). Fundus examinations showed bone spicule-like pigmentation, pale fundus, optic nerve atrophy, retinal vessel attenuation, retinal pigmented epithelium (RPE) degeneration, and macular involvement (Figure 2). Fundus examination of non-RP individual IV:2 showed no pigment migration, but did show unrelated right eye corneal conjunctivalization and left eye age-related cataracts, as determined by two independent ophthalmologists.

### Exome sequencing

Approximately 6.83 GB of raw data were generated by base calling. After the base calling and quality assessment, 45.24 million reads (100%) were generated from proband (IV:4) genomic DNA samples. There were 45.21 million reads (99.94%) aligned to the human reference assembly, and 4442.05 MB effective sequences were on the target region. The average sequencing depth on target region was 73.47 [20,26]. There were 60.22 million covered bases on the target region, meaning that the aligned bases covered 99.60% of the target region. The fraction of bases covered

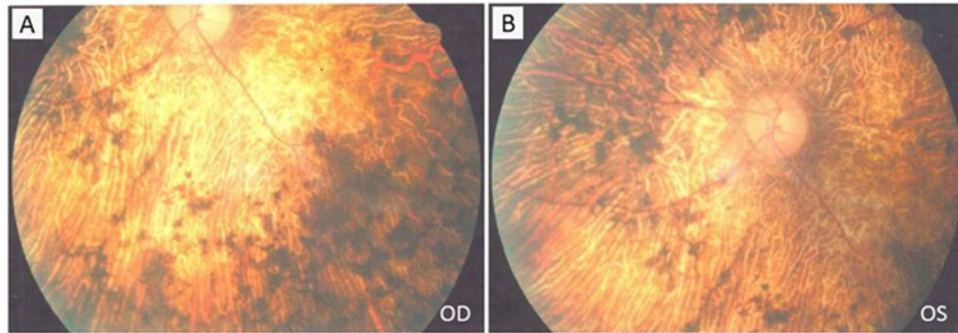

**Figure 2. Fundus photographs of the patient (IV:1) with RP**

Fundus photographs of both eyes (A: right eye, B: left eye) present bone spicule-like pigmentation, pale fundus, optic nerve atrophy, retinal vessel attenuation, and retinal pigment epithelial degeneration.

by the target sequence at 10× or greater was 98.70%. A total of 119268 SNPs and 14179 indels, including 21337 SNPs and 552 indels in exonic regions, and 2320 SNPs and 416 indels in splicing sites, were obtained. A variant filtration prioritization strategy, as described in recent studies, was used for variant analysis [26]. Common variants with a known frequency recorded in public databases were eliminated, which included dbSNP142, 1000 Genomes Project with a frequency of >0.01, the NHLBI ESP6500, and the ExAC, as well as synonymous variants. Non-synonymous variants for any likely pathogenicities were obtained from combining SIFT, PolyPhen-2, MutationTaster, and CADD analyses predictions. Using these filtering criteria, 507 possible deleterious SNPs and 312 indels were suspected as possible causative variants and were prioritized for further screening analysis. Except for a homozygous c.4845delT variant in the *ABCA4* gene (NM\_000350.2), no other homozygous variants or compound heterozygous variants, which were in known disease-causing genes for vision and retinal degeneration disorders, were detected.

### Identification of causative mutation

Using Sanger sequencing, the novel homozygous variant, c.4845delT, in the *ABCA4* gene, was further verified in three patients (IV:1, IV:3, and IV:4, Figure 1B). It was recorded and public in Leiden Open Variation Database v.3.0 (<http://www.lovd.nl/3.0/home>) after the submission. The *ABCA4* gene variant was absent from an unaffected family member (IV:2, Figure 1C) and 100 unrelated controls. The computer-based prediction tool, MutationTaster, predicted that the *ABCA4* gene c.4845delT variant would lead to arginine substitution for lysine at codon 1616 resulting in a premature truncation at codon 1661 (p.K1616Rfs\*46), and be disease causing.

### Discussion

RP is a class of inherited degenerative retinal diseases characterized by progressive retinal dysfunction, outer retina cell loss, and retinal tissue atrophy, eventually leading to tunnel vision and legal or total blindness [7,28]. Clinical features include adolescent-onset night blindness, limited visual fields, decreased visual acuity, and degenerative fundus change, followed by progressive peripheral vision loss, and culminating in adult blindness. RP can come in three forms: early-onset, late-onset, and non-penetrant [28,29].

In this consanguineous Han Chinese family with arRP, a homozygous variant, c.4845delT (p.K1616Rfs\*46), in the *ABCA4* gene was identified. Severe phenotypes and early-onset ages were noticed in three affected family members: IV:1, IV:3, and IV:4. All showed typical RP clinical features, including adolescent-onset night blindness, followed by visual field loss, tunnel vision, and ultimately blindness. Disease severity is equal between male and female patients. These symptoms and the identified c.4845delT variant were absent from an unaffected sibling (IV:2). The variant was present in three patients, and absent from an unaffected family member, the 100 normal controls, the dbSNP142, the 1000 Genomes Project, NHLBI ESP6500, and ExAC. This suggests that it may be a pathogenic mutation. *In silico* analyses indicate that the mutation is probably deleterious. The *ABCA4* compound heterozygous mutations, an exonic deletion, and a heterozygous c.4845delT variant, cannot be fully excluded for the three affected siblings, due to the unavailable genotypes of the deceased parents and limitation of the detection methods applied in this study [30]. Genetic reasons, such as homozygosity, caused by uniparental disomy, should also be considered [31]. The homozygous *ABCA4* c.4845delT alteration was likely to be the responsible variant for arRP in this family due to the consanguinity of deceased parents.



The *ABCA4* gene, mapped to chromosome 1p22.1, contains 50 exons encoding a 2273-amino acid protein, expressed in retinal outer segments of rod and cone photoreceptors. The protein is located in the rod and cone outer segment disc membranes, and participates in the transport and clearance of all-*trans*-retinal, and other molecules passing through the disc membrane into the cytoplasm [32,33].

*ABCA4* gene mutations have been found to be responsible for five autosomal recessive retinal dystrophy phenotypes, including CORD3, RP19, FFM, STGD1, and early-onset severe retinal dystrophy [14-17]. The most severe phenotype, RP19 (arRP), has direct injuries in both rod and cone photoreceptors [34]. At least 41 mutations, including 27 missense/nonsense mutations, 9 splicing mutations, 4 deletions, and a complex rearrangement, in homozygous or compound heterozygous state, have been reported to be responsible for arRP, by the Human Gene Mutation Database and in the published literature [35-38]. Several *ABCA4* heterozygous mutations have been reported in a few RP cases. A second causative mutation, such as deep intronic disease-associated variants, gross deletion, or large rearrangement, might not be detected due to limited genotyping methods. Seemingly benign or common variants, as well as hypomorphic variants, should also be considered [39-42]. *ABCA4*-related disease may result from the all-*trans*-retinal accumulation in the photoreceptor discs owing to reduced activity of *ABCA4* protein, which ultimately results in RPE cell death and secondary loss of photoreceptors [43,44].

*Abca4*<sup>-/-</sup> and *Abca4*<sup>+/-</sup> mice showed delayed dark-adaptation and RPE lipofuscin accumulation, with no photoreceptor degeneration [45,46]. Double-knockout mice, which lacked both *Abca4* and retinol dehydrogenase 8, displayed all-*trans*-retinal accumulation and early severe RPE/photoreceptor dystrophy. The retinopathy was exacerbated by light [47].

In conclusion, a novel homozygous mutation c.4845delT (p.K1616Rfs\*46) in the *ABCA4* gene was detected in a Han Chinese family with arRP. These findings extend both the arRP genotypic and the *ABCA4* gene mutation spectrum. It suggests that exome sequencing is a valid and cost-effective way of identifying gene mutations that may be responsible for genetically, and clinically, heterogeneous disorders. The study may disclose some new clues for RP genetic causes and pathogenesis, as well as clinical and genetic diagnosis. This may contribute to improvement in clinical care, therapy, genetic screening, and counseling, and assist in developing targeted gene therapeutic strategies for RP.

## Acknowledgements

We thank all the enrolled individuals for their participation in the present study.

## Competing interests

The authors declare that there are no competing interests associated with the manuscript.

## Funding

This work was supported by the National Key Research and Development Program of China [grant number 2016YFC1306604]; the National Natural Science Foundation of China [grant number 81670216]; the Natural Science Foundation of Hunan Province [grant numbers 2015JJ4088, 2016JJ2166]; the Grant for the Foster Key Subject of the Third Xiangya Hospital Clinical Laboratory Diagnostics; the New Xiangya Talent Project of the Third Xiangya Hospital of Central South University [grant number 20150301]; the Scientific Research Fund of Hunan Provincial Education [grant number 17B194]; the National-level College Students' Innovative Training Plan Program [grant numbers 201710533217, 201710533227]; and the Undergraduate Innovative Free Exploration Program of Central South University, China [grant number ZY20171017].

## Author contribution

X.H. and H.D. conceived and designed the study. X.H., L.Y., H.X., W.Z., Y.C., J.Y., Y.G., Z.Y., Y.L., and H.D. performed the experiments and analyzed the data. X.H., L.Y., H.X., Y.C., J.Y., and H.D. drafted and refined the manuscript. All authors reviewed the manuscript.

## Abbreviations

*ABCA4*, ATP-binding cassette subfamily A member 4; arRP, autosomal recessive retinitis pigmentosa; CADD, Combined Annotation Dependent Depletion; CORD3, cone-rod

dystrophy 3; dbSNP, single nucleotide polymorphism database; ExAC, Exome Aggregation Consortium; FFM, fundus flavimaculatus; NHLBI ESP6500, National Heart, Lung, and Blood Institute Exome Sequencing Project 6500; PolyPhen-2, Polymorphism Phenotyping version 2; RP, retinitis pigmentosa; RPE, retinal pigmented epithelium; SIFT, Sorting Intolerant from Tolerant; SNP, single nucleotide polymorphism; STGD1, Stargardt disease 1.

## References

- Zhong, Z., Yan, M., Sun, W., Wu, Z., Han, L., , Zhou, Z. et al. (2016) Two novel mutations in PRPF3 causing autosomal dominant retinitis pigmentosa. *Sci. Rep.* **6**, 37840, <https://doi.org/10.1038/srep37840>
- Lyraki, R., Megaw, R. and Hurd, T. (2016) Disease mechanisms of X-linked retinitis pigmentosa due to RP2 and RPGR mutations. *Biochem. Soc. Trans.* **44**, 1235–1244, <https://doi.org/10.1042/BSR20160148>
- Siemiatkowska, A.M., Arimadyo, K., Moruz, L.M., Astuti, G.D., de Castro-Miro, M., , Zonneveld, M.N. et al. (2011) Molecular genetic analysis of retinitis pigmentosa in Indonesia using genome-wide homozygosity mapping. *Mol. Vis.* **17**, 3013–3024
- Zhang, Q. (2016) Retinitis pigmentosa: progress and perspective. *Asia. Pac. J. Ophthalmol. (Phila.)* **5**, 265–271, <https://doi.org/10.1097/APO.0000000000000227>
- Audere, M., Rutka, K., Sepetiene, S. and Lacey, B. (2015) Presentation of complex homozygous allele in ABCA4 gene in a patient with retinitis pigmentosa. *Case Rep. Ophthalmol. Med.* **2015**, 452068, <https://doi.org/10.1155/2015/452068>
- Wert, K.J., Lin, J.H. and Tsang, S.H. (2014) General pathophysiology in retinal degeneration. *Dev. Ophthalmol.* **53**, 33–43, <https://doi.org/10.1159/000357294>
- Toto, L., Borrelli, E., Mastropasqua, R., Senatore, A., Di Antonio, L., Di Nicola, M. et al. (2016) Macular features in retinitis pigmentosa: correlations among ganglion cell complex thickness, capillary density, and macular function. *Invest. Ophthalmol. Vis. Sci.* **57**, 6360–6366, <https://doi.org/10.1167/iovs.16-20544>
- Shastri, B.S. (2008) Evaluation of the common variants of the ABCA4 gene in families with Stargardt disease and autosomal recessive retinitis pigmentosa. *Int. J. Mol. Med.* **21**, 715–720, <https://doi.org/10.3892/ijmm.21.6.715>
- Kjellstrom, U., Veiga-Crespo, P., Andreasson, S. and Ekstrom, P. (2016) Increased plasma cGMP in a family with autosomal recessive retinitis pigmentosa due to homozygous mutations in the PDE6A gene. *Invest. Ophthalmol. Vis. Sci.* **57**, 6048–6057, <https://doi.org/10.1167/iovs.16-19861>
- Ferrari, S., Di Iorio, E., Barbaro, V., Ponzin, D., Sorrentino, F.S. and Parmeggiani, F. (2011) Retinitis pigmentosa: genes and disease mechanisms. *Curr. Genomics* **12**, 238–249, <https://doi.org/10.2174/138920211795860107>
- Perez-Carro, R., Corton, M., Sanchez-Navarro, I., Zurita, O., Sanchez-Bolivar, N., Sanchez-Alcudia, R. et al. (2016) Panel-based NGS reveals novel pathogenic mutations in autosomal recessive retinitis pigmentosa. *Sci. Rep.* **6**, 19531, <https://doi.org/10.1038/srep19531>
- Jones, B.W., Pfeiffer, R.L., Ferrell, W.D., Watt, C.B., Marmor, M. and Marc, R.E. (2016) Retinal remodeling in human retinitis pigmentosa. *Exp. Eye Res.* **150**, 149–165, <https://doi.org/10.1016/j.exer.2016.03.018>
- Arno, G., Agrawal, S.A., Eblimit, A., Bellingham, J., Xu, M., Wang, F. et al. (2016) Mutations in REEP6 cause autosomal-recessive retinitis pigmentosa. *Am. J. Hum. Genet.* **99**, 1305–1315, <https://doi.org/10.1016/j.ajhg.2016.10.008>
- Allikmets, R., Singh, N., Sun, H., Shroyer, N.F., Hutchinson, A., Chidambaram, A. et al. (1997) A photoreceptor cell-specific ATP-binding transporter gene (ABCR) is mutated in recessive Stargardt macular dystrophy. *Nat. Genet.* **15**, 236–246, <https://doi.org/10.1038/ng0397-236>
- Fukui, T., Yamamoto, S., Nakano, K., Tsujikawa, M., Morimura, H., Nishida, K. et al. (2002) ABCA4 gene mutations in Japanese patients with Stargardt disease and retinitis pigmentosa. *Invest. Ophthalmol. Vis. Sci.* **43**, 2819–2824
- Weleber, R.G. (1994) Stargardt's macular dystrophy. *Arch. Ophthalmol.* **112**, 752–754, <https://doi.org/10.1001/archophth.1994.01090180050033>
- Singh, H.P., Jalali, S., Hejtman, J.F. and Kannabiran, C. (2006) Homozygous null mutations in the ABCA4 gene in two families with autosomal recessive retinal dystrophy. *Am. J. Ophthalmol.* **141**, 906–913, <https://doi.org/10.1016/j.ajo.2005.12.009>
- Maugeri, A., Klevering, B.J., Rohrschneider, K., Blankenagel, A., Brunner, H.G., Deutman, A.F. et al. (2000) Mutations in the ABCA4 (ABCR) gene are the major cause of autosomal recessive cone-rod dystrophy. *Am. J. Hum. Genet.* **67**, 960–966, <https://doi.org/10.1086/303079>
- Cremers, F.P., van de Pol, D.J., van Driel, M., den Hollander, A.I., van Haren, F.J., Knoers, N.V. et al. (1998) Autosomal recessive retinitis pigmentosa and cone-rod dystrophy caused by splice site mutations in the Stargardt's disease gene ABCR. *Hum. Mol. Genet.* **7**, 355–362, <https://doi.org/10.1093/hmg/7.3.355>
- Caburet, S., Arboleda, V.A., Llano, E., Overbeek, P.A., Barbero, J.L., Oka, K. et al. (2014) Mutant cohesin in premature ovarian failure. *N. Engl. J. Med.* **370**, 943–949, <https://doi.org/10.1056/NEJMoa1309635>
- McKenna, A., Hanna, M., Banks, E., Sivachenko, A., Cibulskis, K., Kernytsky, A. et al. (2010) The Genome Analysis Toolkit: a MapReduce framework for analyzing next-generation DNA sequencing data. *Genome Res.* **20**, 1297–1303, <https://doi.org/10.1101/gr.107524.110>
- Li, H., Handsaker, B., Wysoker, A., Fennell, T., Ruan, J., Homer, N. et al. (2009) The Sequence Alignment/Map format and SAM tools. *Bioinformatics* **25**, 2078–2079, <https://doi.org/10.1093/bioinformatics/btp352>
- Abyzov, A., Urban, A.E., Snyder, M. and Gerstein, M. (2011) CNVnator: an approach to discover, genotype, and characterize typical and atypical CNVs from family and population genome sequencing. *Genome Res.* **21**, 974–984, <https://doi.org/10.1101/gr.114876.110>
- Xia, H., Xu, H., Deng, X., Yuan, L., Xiong, W., Yang, Z. et al. (2016) Compound heterozygous GJB2 mutations associated to a consanguineous Han family with autosomal recessive non-syndromic hearing loss. *Acta Otolaryngol.* **136**, 782–785, <https://doi.org/10.3109/00016489.2016.1157727>
- Yuan, L., Yi, J., Lin, Q., Xu, H., Deng, X., Xiong, W. et al. (2016) Identification of a PRX variant in a Chinese family with congenital cataract by exome sequencing. *QJM* **109**, 731–735, <https://doi.org/10.1093/qjmed/hcw058>
- Yuan, L., Xu, H., Yuan, J., Deng, X., Xiong, W., Yang, Z. et al. (2016) A novel FN1 variant associated with familial hematuria: TBMN? *Clin. Biochem.* **49**, 816–820, <https://doi.org/10.1016/j.clinbiochem.2016.01.026>

- 27 Huang, X., Deng, X., Xu, H., Wu, S., Yuan, L., Yang, Z. et al. (2015) Identification of a novel mutation in the COL2A1 gene in a Chinese family with spondyloepiphyseal dysplasia congenita. *PLoS ONE* **10**, e0127529, <https://doi.org/10.1371/journal.pone.0127529>
- 28 Daiger, S.P., Bowne, S.J. and Sullivan, L.S. (2007) Perspective on genes and mutations causing retinitis pigmentosa. *Arch. Ophthalmol.* **125**, 151–158, <https://doi.org/10.1001/archophth.125.2.151>
- 29 Daiger, S.P., Bowne, S.J. and Sullivan, L.S. (2014) Genes and mutations causing autosomal dominant retinitis pigmentosa. *Cold Spring Harb. Perspect. Med.* **5**, <https://doi.org/10.1101/cshperspect.a017129>
- 30 Bax, N.M., Sangermano, R., Roosing, S., Thiadens, A.A., Hoefsloot, L.H., van den Born, L.I. et al. (2015) Heterozygous deep-intronic variants and deletions in ABCA4 in persons with retinal dystrophies and one exonic ABCA4 variant. *Hum. Mutat.* **36**, 43–47, <https://doi.org/10.1002/humu.22717>
- 31 Rivolta, C., Sharon, D., DeAngelis, M.M. and Dryja, T.P. (2002) Retinitis pigmentosa and allied diseases: numerous diseases, genes, and inheritance patterns. *Hum. Mol. Genet.* **11**, 1219–1227, <https://doi.org/10.1093/hmg/11.10.1219>
- 32 Allikmets, R., Wasserman, W.W., Hutchinson, A., Smallwood, P., Nathans, J., Rogan, P.K. et al. (1998) Organization of the ABCR gene: analysis of promoter and splice junction sequences. *Gene* **215**, 111–122, [https://doi.org/10.1016/S0378-1119\(98\)00269-8](https://doi.org/10.1016/S0378-1119(98)00269-8)
- 33 Battu, R., Verma, A., Hariharan, R., Krishna, S., Kiran, R., Jacob, J. et al. (2015) Identification of novel mutations in ABCA4 gene: clinical and genetic analysis of Indian patients with Stargardt disease. *Biomed. Res. Int.* **2015**, 940864, <https://doi.org/10.1155/2015/940864>
- 34 Mullins, R.F., Kuehn, M.H., Radu, R.A., Enriquez, G.S., East, J.S., Schindler, E.I. et al. (2012) Autosomal recessive retinitis pigmentosa due to ABCA4 mutations: clinical, pathologic, and molecular characterization. *Invest. Ophthalmol. Vis. Sci.* **53**, 1883–1894, <https://doi.org/10.1167/iovs.12-9477>
- 35 Glockle, N., Kohl, S., Mohr, J., Scheurenbrand, T., Sprecher, A., Weisschuh, N. et al. (2014) Panel-based next generation sequencing as a reliable and efficient technique to detect mutations in unselected patients with retinal dystrophies. *Eur. J. Hum. Genet.* **22**, 99–104, <https://doi.org/10.1038/ejhg.2013.72>
- 36 Riveiro-Alvarez, R., Lopez-Martinez, M.A., Zernant, J., Aguirre-Lamban, J., Cantalapiedra, D., Avila-Fernandez, A. et al. (2013) Outcome of ABCA4 disease-associated alleles in autosomal recessive retinal dystrophies: retrospective analysis in 420 Spanish families. *Ophthalmology* **120**, 2332–2337, <https://doi.org/10.1016/j.ophtha.2013.04.002>
- 37 Mandal, M.N., Heckenlively, J.R., Burch, T., Chen, L., Vasireddy, V., Koenekoop, R.K. et al. (2005) Sequencing arrays for screening multiple genes associated with early-onset human retinal degenerations on a high-throughput platform. *Invest. Ophthalmol. Vis. Sci.* **46**, 3355–3362, <https://doi.org/10.1167/iovs.05-0007>
- 38 Singh, H.P., Jalali, S., Narayanan, R. and Kannabiran, C. (2009) Genetic analysis of Indian families with autosomal recessive retinitis pigmentosa by homozygosity screening. *Invest. Ophthalmol. Vis. Sci.* **50**, 4065–4071, <https://doi.org/10.1167/iovs.09-3479>
- 39 Ozgul, R.K., Durukan, H., Turan, A., Oner, C., Ogus, A. and Farber, D.B. (2004) Molecular analysis of the ABCA4 gene in Turkish patients with Stargardt disease and retinitis pigmentosa. *Hum. Mutat.* **23**, 523, <https://doi.org/10.1002/humu.9236>
- 40 Deng, H., Le, W.D., Hunter, C.B., Ondo, W.G., Guo, Y., Xie, W.J. et al. (2006) Heterogeneous phenotype in a family with compound heterozygous parkin gene mutations. *Arch. Neurol.* **63**, 273–277, <https://doi.org/10.1001/archneur.63.2.273>
- 41 Schulz, H.L., Grassmann, F., Kellner, U., Spital, G., Ruther, K., Jagle, H. et al. (2017) Mutation spectrum of the ABCA4 gene in 335 Stargardt disease patients from a multicenter German cohort-impact of selected deep intronic variants and common SNPs. *Invest. Ophthalmol. Vis. Sci.* **58**, 394–403, <https://doi.org/10.1167/iovs.16-19936>
- 42 Zernant, J., Lee, W., Collison, F.T., Fishman, G.A., Sergeev, Y.V., Schuerch, K. et al. (2017) Frequent hypomorphic alleles account for a significant fraction of ABCA4 disease and distinguish it from age-related macular degeneration. *J. Med. Genet.* **54**, 404–412, <https://doi.org/10.1136/jmedgenet-2017-104540>
- 43 Klevering, B.J., Deutman, A.F., Maugeri, A., Cremers, F.P. and Hoyng, C.B. (2005) The spectrum of retinal phenotypes caused by mutations in the ABCA4 gene. *Graef. Arch. Clin. Exp. Ophthalmol.* **243**, 90–100, <https://doi.org/10.1007/s00417-004-1079-4>
- 44 Klevering, B.J., Maugeri, A., Wagner, A., Go, S.L., Vink, C., Cremers, F.P. et al. (2004) Three families displaying the combination of Stargardt's disease with cone-rod dystrophy or retinitis pigmentosa. *Ophthalmology* **111**, 546–553, <https://doi.org/10.1016/j.ophtha.2003.06.010>
- 45 Weng, J., Mata, N.L., Azarian, S.M., Tzekov, R.T., Birch, D.G. and Travis, G.H. (1999) Insights into the function of Rim protein in photoreceptors and etiology of Stargardt's disease from the phenotype in abcr knockout mice. *Cell* **98**, 13–23, [https://doi.org/10.1016/S0092-8674\(00\)80602-9](https://doi.org/10.1016/S0092-8674(00)80602-9)
- 46 Mata, N.L., Tzekov, R.T., Liu, X., Weng, J., Birch, D.G. and Travis, G.H. (2001) Delayed dark-adaptation and lipofuscin accumulation in abcr+/- mice: implications for involvement of ABCR in age-related macular degeneration. *Invest. Ophthalmol. Vis. Sci.* **42**, 1685–1690
- 47 Maeda, A., Maeda, T., Golczak, M. and Palczewski, K. (2008) Retinopathy in mice induced by disrupted all-trans-retinal clearance. *J. Biol. Chem.* **283**, 26684–26693, <https://doi.org/10.1074/jbc.M804505200>
